# Supplementary material for: Active site geometry stabilization of a presenilin homolog by the lipid bilayer promotes intramembrane proteolysis
Source: eLife journal article supplement (doi:10.7554/elife.76090), 2022-05-17
Supplement: fig5-figsupp1-data1 [file Figure5-figure supplement1A-RMSD.xlsx]

## Sheet: Tabelle1
Figure5 - Figure supplement1A - RMSD. Source data for RMSD (Å) (Figure 5 - Figure supplement 1A).
	frame1	frame2	frame3	frame4	frame5	frame6	frame7	frame8	frame9	frame10	frame11	frame12	frame13	frame14	frame15	frame16	frame17	frame18	frame19	frame20	frame21	frame22	frame23	frame24	frame25	frame26	frame27	frame28	frame29	frame30	frame31	frame32	frame33	frame34	frame35	frame36	frame37	frame38	frame39	frame40	frame41	frame42	frame43	frame44	frame45	frame46	frame47	frame48	frame49
Bilayer Model 1-1	0	1.5917	1.9694	2.0703	2.306	2.3906	2.3744	2.5395	2.459	2.4557	2.2927	2.4213	2.6042	2.5452	2.8016	2.6903	2.9369	2.9391	2.9231	2.9506	3.0788	3.0354	2.9824	3.0051	3.0267	3.244	3.0865	3.117	3.2092	3.2627	3.4473	3.5933	3.4943	3.4451	3.4053	3.2444	3.5767	3.5083	3.5352	3.4967	3.59	3.6718	3.3842	3.4981	3.7837	3.5813	3.6987	3.576	3.6573
Bilayer Model 1-2	0	1.9603	2.1511	2.7337	2.8031	3.0216	3.4476	3.4225	3.1917	3.374	3.3867	3.1134	3.4232	3.2627	3.2145	3.2266	3.28	3.3384	3.2554	3.2297	3.1878	3.2796	3.1336	3.3786	3.3905	3.494	3.5469	3.4061	3.4914	3.4496	3.5726	3.3977	3.4118	3.4957	3.4072	3.2537	3.2009	3.2832	3.445	3.3353	3.2836	3.5394	3.6177	3.5638	3.6355	3.664	3.6281	3.4861	3.5776
Bilayer Model 1-3	0	2.2523	2.227	2.4042	2.6476	2.6034	2.7883	2.7435	2.9322	2.982	2.9832	3.0544	3.0215	3.3489	3.468	3.7576	3.7544	3.747	3.9121	3.7771	3.7797	3.8829	3.5889	3.5852	3.5524	3.8248	3.6547	3.6541	3.5993	3.7116	3.5391	3.5857	3.5078	3.8467	3.6982	3.7356	3.6964	3.8251	3.7173	3.7141	3.8288	3.6815	3.4945	3.67	3.6455	3.5858	3.6353	3.8674	3.7208
Micelles Model 1-1	0	2.1673	2.8749	2.9946	3.1479	3.1066	3.3195	3.2816	3.2323	2.8471	3.0081	2.8402	2.5545	2.7686	2.5556	2.7069	2.6829	2.7345	2.7022	2.71	2.6443	2.9012	2.8356	2.6922	3.1022	2.8437	2.7767	2.8683	2.6746	3.0054	2.7993	3.1698	3.2403	3.2598	3.4394	3.4338	3.4221	3.559	3.6383	3.532	3.4167	3.4313	3.4503	3.4727	3.443	3.7196	3.5288	3.4286	3.4319
Micelles Model 1-2	0	1.8282	2.0647	2.3971	2.7385	2.703	2.8599	2.8909	3.2614	2.9814	3.0151	3.067	3.0541	3.0888	3.015	3.1495	2.9596	2.9608	3.0459	2.9127	3.0953	3.0994	2.9879	3.0243	3.5236	3.276	3.1616	3.0834	3.1276	3.1289	3.2958	3.1336	3.1885	3.0573	2.9231	3.0142	3.091	3.0076	3.0879	3.1848	3.0604	3.0824	3.0022	2.9964	3.1073	2.9876	3.0316	2.8993	3.0966
Micelles Model 1-3	0	1.8291	2.0873	2.2213	2.2326	2.3311	2.5042	2.3795	2.38	2.4326	2.5574	2.5744	2.8626	2.5881	2.5415	2.7292	2.6976	2.4425	2.5702	2.7481	2.5234	2.4856	2.4541	2.4561	2.5858	2.5053	2.4686	2.6329	2.5939	2.4844	2.6221	2.6609	2.534	2.5884	2.7612	2.5443	2.552	2.99	2.9197	2.9488	2.8902	2.9913	2.8862	2.9228	2.8777	3.0786	3.2893	3.3898	3.1808
Bilayer Model 1-1	0	1.6581	1.6942	1.661	1.6548	1.9775	2.1271	2.2506	2.3067	1.9607	2.1797	2.2747	2.1382	2.2463	2.2048	2.3587	2.3927	2.4308	2.6046	2.4493	2.6197	2.4524	2.5687	2.5292	2.5011	2.5081	2.4455	2.707	2.4943	2.4834	2.6549	2.7769	2.5454	2.6875	2.4982	2.4846	2.4587	2.7177	2.8338	2.5786	2.5713	2.684	2.587	2.4362	2.802	2.7965	2.8229	2.6677	2.7611
Bilayer Model 1-2	0	1.7768	1.7003	1.8089	2.0957	2.4604	2.3984	2.223	2.5746	2.5303	2.6968	2.9898	2.9746	3.0363	3.1622	3.058	3.1239	2.9443	2.9396	2.9336	2.7954	2.8024	2.9211	2.937	3.0853	2.7712	2.9262	2.8529	3.0315	2.8543	2.917	2.4682	2.7455	2.6354	2.7034	2.798	2.7883	2.9697	3.0897	2.909	2.8853	2.8804	2.7189	2.8342	2.9817	2.8475	2.9437	2.8821	2.7362
Bilayer Model 1-3	0	1.3064	1.5935	1.449	1.4446	1.3203	1.5369	1.4516	1.6433	1.7729	1.7711	1.6323	1.6107	1.539	1.7421	1.7614	1.8278	2.0213	1.9119	1.8769	1.7654	1.972	1.7871	1.7641	2.034	1.8491	1.7484	1.6528	1.6965	2.025	1.7761	1.947	1.8567	1.844	2.021	1.9724	2.2376	2.2349	2.1033	2.1132	2.3163	2.1278	2.114	2.1514	1.994	2.1105	2.1503	2.3208	2.2478
Micelles Model 1-1	0	1.7355	1.9282	1.8275	1.8198	1.9249	1.938	1.9141	1.776	1.8525	1.7289	1.9974	1.9154	2.0338	2.0255	2.0635	2.1809	2.0908	2.0647	1.8018	1.9448	1.9595	1.9896	2.003	2.2556	2.1545	2.0956	2.1657	2.1761	2.3276	2.1562	2.2515	2.0961	2.1125	2.2055	2.098	2.0077	1.9772	2.1258	2.0373	2.0866	2.0943	1.9803	2.1336	2.1354	1.9879	2.0147	2.1924	2.0822
Micelles Model 1-2	0	1.3661	1.6887	1.8941	2.0109	2.139	2.153	2.1676	2.2107	2.4131	2.3969	2.2993	2.2302	2.4277	2.4031	2.4105	2.3807	2.2995	2.3822	2.6033	2.432	2.58	2.4582	2.4205	2.4847	2.4591	2.6937	2.5679	2.428	2.4918	2.6283	2.6555	2.3948	2.503	2.5825	2.6009	2.6934	2.6331	2.4566	2.6737	2.6606	2.6943	2.7	2.5012	2.6462	2.7158	2.5308	2.6093	2.6066
Micelles Model 1-3	0	1.6229	1.8208	2.0513	2.1279	2.1218	2.1499	2.0755	2.0784	2.0344	2.1153	2.1533	2.1183	1.9671	2.0883	2.0055	1.9251	2.0008	2.0976	2.2738	2.3362	2.1554	2.3157	2.2681	2.3886	2.4711	2.485	2.4879	2.5634	2.5069	2.4493	2.3857	2.4513	2.3861	2.1556	2.2225	2.1663	2.1795	2.2923	2.3869	2.2802	2.3025	2.3032	2.1275	2.2256	2.0907	2.2292	2.1921	2.1908
Bilayer Model 1-1	0	1.4697	1.6214	1.5894	1.7733	1.7915	2.0875	2.0003	1.9288	1.8381	1.9987	2.1059	2.1194	2.204	2.4478	2.2644	2.4746	2.3163	2.457	2.3125	2.565	2.6622	2.5949	2.6335	2.47	2.689	2.3957	2.5216	2.4276	2.8202	2.6864	2.7322	2.7074	2.7496	3.058	2.8399	2.8628	2.9028	2.7929	2.8835	2.6729	2.9524	2.9613	2.6938	2.5845	2.7274	2.6444	2.7344	2.6769
Bilayer Model 1-2	0	1.381	1.6295	2.0533	2.2212	2.0763	2.1773	2.0179	2.075	2.1207	2.1678	2.2151	2.1214	2.0956	2.0614	2.2086	2.2447	2.1603	2.246	2.2439	2.2884	2.2482	2.1835	2.138	2.1524	2.2122	2.1461	2.0724	2.2348	2.2901	2.2681	2.3973	2.2664	2.3619	2.3025	2.5665	2.393	2.4462	2.3605	2.5297	2.4986	2.5063	2.5053	2.4418	2.4642	2.5851	2.4777	2.6361	2.6459
Bilayer Model 1-3	0	1.6202	1.8336	2.254	2.1731	2.4645	2.4322	2.3103	2.4465	2.5655	2.6122	3.092	3.2798	2.9805	3.1892	3.3328	3.1331	3.1695	3.4435	3.5665	3.6391	3.3963	3.6268	3.6694	3.7321	3.6301	3.8959	3.3158	3.6429	3.7499	3.7214	3.5976	3.6843	3.4715	3.4182	3.4228	3.4843	3.6745	3.6484	3.4357	3.4523	3.6174	3.3677	3.6026	3.5383	3.4989	3.5034	3.4706	3.4711
Micelles Model 1-1	0	1.5073	1.6445	1.6818	1.6895	1.7574	1.919	1.8893	1.9207	1.8555	1.9524	1.9317	2.0005	2.0428	2.153	2.0725	2.3454	2.2619	2.0998	2.2722	2.4501	2.3127	2.3635	2.3437	2.3824	2.2975	2.2153	2.2068	2.2387	2.3518	2.3743	2.372	2.4503	2.6274	2.5027	2.605	2.6554	2.6197	2.632	2.6268	2.5473	2.6397	2.5739	2.6721	2.7609	2.8305	2.7772	2.8364	2.6316
Micelles Model 1-2	0	1.5025	1.6582	1.7347	1.7771	2.0734	1.9501	2.2043	2.0555	2.186	2.0465	2.0704	2.0853	2.1455	2.2541	2.3102	2.4657	2.3851	2.4069	2.5328	2.4404	2.326	2.3442	2.3405	2.5446	2.6108	2.5906	2.5017	2.5927	2.5571	2.6849	2.7281	3.0167	2.5539	2.6171	2.5405	2.6842	2.7807	2.5265	2.6932	2.4881	2.5058	2.5655	2.9018	2.9683	3.0087	3.0757	2.9642	2.8959
Micelles Model 1-3	0	1.5025	1.6582	1.7347	1.7771	2.0734	1.9501	2.2043	2.0555	2.186	2.0465	2.0704	2.0853	2.1455	2.2541	2.3102	2.4657	2.3851	2.4069	2.5328	2.4404	2.326	2.3442	2.3405	2.5446	2.6108	2.5906	2.5017	2.5927	2.5571	2.6849	2.7281	3.0167	2.5539	2.6171	2.5405	2.6842	2.7807	2.5265	2.6932	2.4881	2.5058	2.5655	2.9018	2.9683	3.0087	3.0757	2.9642	2.8959
[truncated: 551 more columns]
