# Supplementary material for: Active site geometry stabilization of a presenilin homolog by the lipid bilayer promotes intramembrane proteolysis
Source: eLife journal article supplement (doi:10.7554/elife.76090), 2022-05-17
Supplement: fig5-figsupp1-data1 [file Figure5-figure supplement1B-TMD6a-RMSF.xlsx]

## Sheet: Tabelle1
Figure 5 - Figure supplement 1B - TMD6a-RMSF. Source data for PSH RMSF (Å) (Figure 5 -Figure supplement 1B)
	RES170	RES171	RES172	RES173	RES174	RES175	RES176	RES177	RES178	RES179	RES180	RES181	RES182	RES183	RES184	RES185
Bilayer Model 1-1	1.087	1.2116	1.3098	1.3049	1.3015	1.375	1.4468	1.5656	1.7213	1.6174	1.6888	1.4953	1.2806	1.3316	1.3482	1.1976
Bilayer Model 1-2	0.7333	0.7526	0.7138	0.8313	1.0163	1.053	0.9807	0.8082	0.825	0.8361	0.9569	0.9439	0.7835	0.7648	0.773	0.7697
Bilayer Model 1-3	1.33	1.2589	1.0007	0.9407	1.1482	1.0884	0.9289	1.2653	1.336	1.1461	1.0368	1.0823	1.041	1.2741	1.0033	0.7926
Micelles Model 1-1	1.8252	2.0875	2.8183	3.0867	2.3976	1.6793	2.1381	2.0762	2.0085	1.6744	1.3239	1.2819	1.2699	1.0054	1.0551	0.914
Micelles Model 1-2	1.191	1.3976	1.4366	1.0879	0.9828	0.8341	1.0043	1.2426	1.5186	1.5609	1.2061	1.0361	0.9775	1.1445	1.0827	0.998
Micelles Model 1-3	0.7396	0.792	0.7275	0.7045	0.8003	0.8224	0.7989	0.8445	0.9269	1.0189	1.1234	1.0089	0.9376	0.8005	0.668	0.675
Bilayer Model 2-1	0.8457	0.8666	0.8325	0.8674	0.9017	0.866	0.8572	1.0087	1.1478	0.981	0.7391	0.7916	0.8212	0.9039	0.757	0.6678
Bilayer Model 2-2	1.0754	1.1621	1.1257	1.1081	1.011	0.9402	0.9722	0.935	0.8942	0.8868	0.822	0.9105	0.8686	0.8482	0.7313	0.606
Bilayer Model 2-3	1.218	1.1541	0.9102	1.0357	1.057	0.9001	0.9447	1.0796	1.0972	1.0291	1.0274	0.964	0.9957	0.8263	0.8663	0.9016
Micelles Model 2-1	0.9218	0.9334	0.9441	1.231	1.6959	1.2652	1.9606	2.7038	2.6081	2.3114	1.9324	2.1805	1.9622	2.2456	1.6731	1.102
Micelles Model 2-2	1.6368	1.6308	1.5984	1.5031	1.5628	1.6461	1.6294	1.6691	1.87	1.8534	1.9811	1.9764	1.7125	1.2707	1.0571	0.9896
Micelles Model 2-3	0.8783	0.8758	0.7627	0.7549	0.7091	0.7086	0.7876	0.8278	0.9213	0.9594	1.4166	1.3798	1.3314	1.209	1.1126	0.7499
Bilayer Model 3-1	1.1208	1.1118	0.9938	1.0244	1.0103	0.9412	1.0146	1.1182	1.2017	1.3242	1.503	1.6373	1.9658	1.8878	2.0183	1.6183
Bilayer Model 3-2	0.8576	0.7501	0.6563	0.681	0.7025	0.6992	0.7527	0.8434	0.8722	0.8211	0.837	1.0466	1.0657	1.0511	0.879	0.8675
Bilayer Model 3-3	0.9447	0.9568	0.9051	1.0296	1.0774	1.0087	1.227	1.3332	1.1696	1.426	1.5846	2.0668	2.5101	2.344	1.788	1.5879
Micelles Model 3-1	1.4782	1.3347	1.3665	1.3394	1.259	1.2721	1.3749	1.3101	1.3783	1.568	1.7616	1.7818	1.7231	1.4979	1.7146	1.2475
Micelles Model 3-2	1.0135	1.0249	0.8719	0.8341	0.8624	0.8114	0.8046	0.9049	0.8923	0.9791	1.1359	1.4362	1.6856	2.5283	2.4	2.5989
Micelles Model 3-3	1.0135	1.0249	0.8719	0.8341	0.8624	0.8114	0.8046	0.9049	0.8923	0.9791	1.1359	1.4362	1.6856	2.5283	2.4	2.5989
