# Supplementary material for: Active site geometry stabilization of a presenilin homolog by the lipid bilayer promotes intramembrane proteolysis
Source: eLife journal article supplement (doi:10.7554/elife.76090), 2022-05-17
Supplement: fig5-figsupp3-data1 [file Figure5-figure supplement3C-TMD6a-RMSF.xlsx]

## Sheet: Tabelle1
Figure 5 - Figure supplement 3C - TMD6a-RMSF. Source data for PSH RMSF (Å) (Figure 5 -Figure supplement 3C)
	RES170	RES171	RES172	RES173	RES174	RES175	RES176	RES177	RES178	RES179	RES180	RES181	RES182	RES183	RES184	RES185
Bilayer Model 2-1	0.8457	0.8666	0.8325	0.8674	0.9017	0.866	0.8572	1.0087	1.1478	0.981	0.7391	0.7916	0.8212	0.9039	0.757	0.6678
Bilayer Model 2-2	1.0754	1.1621	1.1257	1.1081	1.011	0.9402	0.9722	0.935	0.8942	0.8868	0.822	0.9105	0.8686	0.8482	0.7313	0.606
Bilayer Model 2-3	1.218	1.1541	0.9102	1.0357	1.057	0.9001	0.9447	1.0796	1.0972	1.0291	1.0274	0.964	0.9957	0.8263	0.8663	0.9016
Bilayer Model 3-1	1.1208	1.1118	0.9938	1.0244	1.0103	0.9412	1.0146	1.1182	1.2017	1.3242	1.503	1.6373	1.9658	1.8878	2.0183	1.6183
Bilayer Model 3-2	0.8576	0.7501	0.6563	0.681	0.7025	0.6992	0.7527	0.8434	0.8722	0.8211	0.837	1.0466	1.0657	1.0511	0.879	0.8675
Bilayer Model 3-3	0.9447	0.9568	0.9051	1.0296	1.0774	1.0087	1.227	1.3332	1.1696	1.426	1.5846	2.0668	2.5101	2.344	1.788	1.5879
