# Supplementary material for: Active site geometry stabilization of a presenilin homolog by the lipid bilayer promotes intramembrane proteolysis
Source: eLife journal article supplement (doi:10.7554/elife.76090), 2022-05-17
Supplement: fig6-figsupp2-data1 [file Figure6-figure supplement2B-SCH.xlsx]

## Sheet: Tabelle1
Figure 6 - Figure supplement 2B -SCH. Source data for lipid order parameter (SCH) (Figure 6 - Figure supplement 2B).
DDM	2	3	4	5	6	7	8	9	10	11
run1	0.0527895	0.0510874	0.0481434	0.049843	0.0464669	0.044079	0.0407672	0.0384981	0.034545	0.0315645
run2	0.0313323	0.0276582	0.0255532	0.0254769	0.0217882	0.0216989	0.0206017	0.0187945	0.0169963	0.0152961
run3	0.0746604	0.0787073	0.0745133	0.0749268	0.0690937	0.0648634	0.0584159	0.0538374	0.0455155	0.0398595
POPC16-0 (sn-1)	2	3	4	5	6	7	8	9	10	11	12	13	14	15
run1	0.346604	0.259017	0.319949	0.310482	0.32707	0.306243	0.300499	0.273	0.258662	0.230912	0.212445	0.185672	0.162658	0.125216
run2	0.349628	0.266524	0.32827	0.31835	0.333421	0.310437	0.302812	0.275128	0.2596	0.230126	0.212751	0.186317	0.164814	0.126388
run3	0.34477	0.25646	0.315318	0.305112	0.323428	0.303382	0.296094	0.269558	0.256343	0.227494	0.210558	0.183375	0.160495	0.12408
POPC18-1 (sn-2)	2	3	4	5	6	7	8	9	10	11	12	13	14	15	16	17
run1	0.200918	0.34672	0.326402	0.328754	0.283811	0.268386	0.158099	0.13055	0.124434	0.116225	0.155931	0.162408	0.16931	0.159821	0.14682	0.117881
run2	0.200723	0.347376	0.327094	0.329988	0.286795	0.270278	0.158553	0.132727	0.124418	0.115881	0.157493	0.165102	0.173479	0.161905	0.147095	0.117124
run3	0.203042	0.347756	0.32725	0.330264	0.284763	0.26894	0.158003	0.131083	0.124181	0.114673	0.152421	0.160567	0.168133	0.154695	0.140944	0.112947
