# Supplementary material for: Active site geometry stabilization of a presenilin homolog by the lipid bilayer promotes intramembrane proteolysis
Source: eLife journal article supplement (doi:10.7554/elife.76090), 2022-05-17
Supplement: fig6-figsupp2-data1 [file Figure6-figure supplement2C-area lipid.xlsx]

## Sheet: Tabelle1
Figure 6 - Figure supplement 2C -area lipid. Source data for area per lipid (Å2)(Figure 6 - Figure supplement 2C).
	frame1	frame2	frame3	frame4	frame5	frame6	frame7	frame8	frame9	frame10	frame11	frame12	frame13	frame14	frame15	frame16	frame17	frame18	frame19	frame20	frame21	frame22	frame23	frame24	frame25	frame26	frame27	frame28	frame29	frame30	frame31	frame32	frame33	frame34	frame35	frame36	frame37	frame38	frame39	frame40	frame41	frame42	frame43	frame44	frame45	frame46	frame47	frame48	frame49
run1-upper leaflet	69.4201	69.2654	69.0177	68.8733	68.8217	68.6772	68.3677	68.0994	68.2645	68.1212	68.0901	67.9018	67.7273	67.7171	67.635	67.9599	67.7866	67.5067	67.5665	67.6914	67.8403	67.9892	68.0587	68.148	68.3521	68.5593	68.5494	68.3989	68.13	68.0603	68.1598	68.2495	68.3291	68.2993	68.4352	68.7277	68.6772	69.0995	68.8454	68.6276	68.0194	68.0294	67.8298	67.8497	67.7699	67.5208	67.2321	67.1325	67.4113
run1-lower leaflet	67.6431	67.6431	67.5358	67.4667	67.4766	67.5062	67.4864	67.5259	67.6443	67.5456	67.6541	67.4553	67.5146	67.3961	67.2183	67.3269	67.2829	67.1251	67.1153	67.2533	67.1744	67.1153	67.3739	67.6328	67.2596	67.1207	67.1011	67.3069	67.2677	67.2873	67.2873	67.4147	67.4441	67.1795	66.9248	66.8464	66.768	66.7288	66.621	66.4642	66.2977	66.572	66.4544	66.3585	66.417	66.417	66.4267	66.6247	66.6616
run2-upper leaflet	68.0083	67.9484	68.4897	68.5406	68.5101	68.5507	68.6016	68.683	68.5813	68.6525	68.4999	68.683	68.6626	68.3575	68.2761	68.3553	68.4476	68.3758	68.3553	68.3553	68.2732	68.0988	68.068	67.9347	67.6463	67.5548	67.5141	67.5853	67.1887	66.9243	66.8633	66.8938	67.1348	67.1145	67.2566	67.2769	67.4698	67.216	67.1856	67.216	67.348	67.0189	67.2005	67.1904	66.9685	67.208	67.2116	67.2764	67.0403
run3-lower leaflet	67.2351	67.4883	67.4012	67.4109	67.256	67.2173	67.1302	67.1979	67.1205	67.1882	67.2463	67.4399	67.498	67.6335	67.9046	68.0691	68.0885	67.8852	68.1175	68.0973	68.0198	67.7196	67.6324	67.7389	67.6287	67.9427	68.0306	68.3701	68.4397	68.8733	68.813	68.9915	68.9815	69.0217	68.7218	68.4439	68.6821	68.6622	68.6523	68.7019	68.5134	68.4545	68.4447	68.5337	68.3556	68.1774	68.1506	68.3391	68.0943
run3-upper leaflet	68.7323	68.8351	69.1017	69.2842	69.0611	68.8582	68.5144	68.3132	68.0113	68.2327	68.2729	68.5227	68.6134	68.7443	68.7946	68.6537	68.704	68.7846	69.0766	69.0867	68.9659	69.0364	69.0565	69.0364	68.9256	69.0061	69.1572	68.9659	69.0061	69.2819	69.3635	68.8332	68.3104	68.6884	68.4936	68.5077	68.4473	68.6688	68.6386	68.7043	68.6462	68.5656	68.6059	68.6563	68.9484	68.7671	68.8779	68.8577	68.7469
run3-lower leaflet	67.8044	67.9995	68.0134	67.9841	68.1796	68.0427	67.78	67.9362	68.0241	67.8972	67.8002	67.8587	68.105	67.9683	67.9195	67.9488	67.661	67.8121	67.7341	67.7341	67.957	67.9176	68.3803	68.4405	68.6712	68.7113	68.6852	68.9107	68.9008	68.9008	68.9107	68.7911	68.6715	68.3326	68.3126	68.1531	68.1631	68.1731	68.1232	68.213	68.1831	68.0136	67.9139	68.067	68.1377	68.0569	68.1074	68.4124	68.4426
[truncated: 521 more columns]
