# Supplementary material for: Active site geometry stabilization of a presenilin homolog by the lipid bilayer promotes intramembrane proteolysis
Source: eLife journal article supplement (doi:10.7554/elife.76090), 2022-05-17
Supplement: fig6-figsupp3-data1 [file Figure6-figure supplement3B-SCH.xlsx]

## Sheet: Tabelle1
Figure6 - Figure supplement 3B - SCH. Source data for lipid order parameter (SCH) (Figure 6 - Figure supplement 3B).
DDM (150 molecules)	2	3	4	5	6	7	8	9	10	11
run1	0.0527895	0.0510874	0.0481434	0.049843	0.0464669	0.044079	0.0407672	0.0384981	0.034545	0.0315645
run2	0.0313323	0.0276582	0.0255532	0.0254769	0.0217882	0.0216989	0.0206017	0.0187945	0.0169963	0.0152961
run3	0.0746604	0.0787073	0.0745133	0.0749268	0.0690937	0.0648634	0.0584159	0.0538374	0.0455155	0.0398595
DDM (225 molecules)	2	3	4	5	6	7	8	9	10	11
run1	0.0790353	0.0756995	0.0725561	0.0765042	0.072755	0.0723923	0.0672397	0.066938	0.0595187	0.0503978
run2	0.0813032	0.0816242	0.0770093	0.0827694	0.0784018	0.079608	0.0760347	0.0732065	0.0645792	0.0533978
run3	0.0884705	0.0850364	0.0852154	0.0883329	0.088367	0.0867046	0.0815112	0.0787114	0.068603	0.0556001
