# Supplementary material for: Active site geometry stabilization of a presenilin homolog by the lipid bilayer promotes intramembrane proteolysis
Source: eLife journal article supplement (doi:10.7554/elife.76090), 2022-05-17
Supplement: fig6-figsupp3-data1 [file Figure6-figure supplement3D-C83-RMSF.xlsx]

## Sheet: Tabelle1
Figure 6 - Figure supplement 3D - C83-RMSF. Source data for C83 RMSF (Å) (Figure 6 - Figure supplement 3D).
	RES26	RES27	RES28	RES29	RES30	RES31	RES32	RES33	RES34	RES35	RES36	RES37	RES38	RES39	RES40	RES41	RES42	RES43	RES44	RES45	RES46	RES47	RES48	RES49	RES50	RES51	RES52	RES53
Micelles Model 2-1	5.8108	4.4328	2.963	2.5446	1.9229	1.5895	1.5079	1.3532	1.0825	0.9199	0.8934	0.7844	0.6295	0.5256	0.5365	0.5687	0.4895	0.419	0.4403	0.466	0.4737	0.4549	0.5027	0.5202	0.5527	0.6771	0.934	1.4132
Micelles Model 2-2	4.0196	3.1423	2.4727	2.4332	2.1172	1.8294	1.6678	1.4864	1.298	1.1158	0.986	0.8602	0.7669	0.708	0.6529	0.6143	0.6193	0.6114	0.6438	0.6534	0.6683	0.719	0.6996	0.7579	0.8363	0.9919	1.0158	1.1539
Micelles Model 2-3	2.0389	2.282	2.0505	1.9777	1.8571	1.6134	1.4282	1.3314	1.1526	0.9896	0.8812	0.8072	0.7473	0.6835	0.6222	0.5721	0.5921	0.5535	0.5278	0.6221	0.6574	0.6537	0.5824	0.5778	0.5108	0.5215	0.5548	0.7166
Large Micelles Model 2-1	2.4341	2.2497	2.4351	2.6243	2.4952	1.4836	1.1468	1.1649	1.1559	1.0147	0.9984	1.0108	0.9366	0.8645	0.7853	0.6793	0.6328	0.576	0.5142	0.5128	0.5047	0.5216	0.525	0.6384	0.8384	0.9947	0.9684	1.1175
Large Micelles Model 2-2	2.9958	2.7616	2.3698	2.1594	1.7329	1.6114	1.7319	1.4672	1.1171	1.1065	1.0634	0.8112	0.6032	0.5395	0.5265	0.4943	0.4637	0.4506	0.4732	0.4672	0.5008	0.5225	0.5462	0.6428	0.6801	0.7964	0.9087	1.1557
Large Micelles Model 2-3	2.1962	1.8862	1.7927	1.7028	1.4933	1.2385	1.1171	1.0649	0.8904	0.6828	0.686	0.6736	0.5899	0.5274	0.5445	0.5022	0.4767	0.4981	0.5147	0.5596	0.6097	0.5586	0.5425	0.6994	0.6193	0.6324	0.7235	0.8366
