# Supplementary material for: Active site geometry stabilization of a presenilin homolog by the lipid bilayer promotes intramembrane proteolysis
Source: eLife journal article supplement (doi:10.7554/elife.76090), 2022-05-17
Supplement: fig6-figsupp3-data1 [file Figure6-figure supplement3E-C83-water.xlsx]

## Sheet: Tabelle1
Figure 6 - Figure supplement 3E - C83-water. Source data for C83 water accessibility (Figure 6 - Figure supplement 3E).
	RES26	RES27	RES28	RES29	RES30	RES31	RES32	RES33	RES34	RES35	RES36	RES37	RES38	RES39	RES40	RES41	RES42	RES43	RES44	RES45	RES46	RES47	RES48	RES49	RES50	RES51	RES52	RES53
Micelles Model 2-1	11.5091	9.8136	14.7273	3.7591	2.9409	3.4727	4.3727	0.4955	0.6955	0.7136	1.3545	0	0.0091	0.7	0	0.0091	0.0091	0	0.9955	1.1818	0.5364	2.6773	3.4727	6.6545	5.6727	3.4455	7.5409	8.3591
Micelles Model 2-2	9.4455	11.7273	14.1318	4.45	2.6409	3.3545	5.7227	0.5227	0.2455	2.3955	0.4909	0.0045	0.0091	0.1182	0.0045	0	0	0	0.6909	1.7182	1.3	3.85	8.6409	7.0182	6.3409	7.1909	6.6636	14.6909
Micelles Model 2-3	6.0773	11.6136	14.0091	2.5682	2.5273	4.5773	1.8273	0.0364	0.2909	2.0727	0.0091	0	0	0.0091	0	0	0	0	0.9545	1.0227	0.4864	3.3136	5.9	6.9455	5.95	2.8955	6.9773	7.2909
Large Micelles Model 2-1	12.4318	10.5773	12.3727	5.0091	3.3045	2.0136	6.1727	0.2	0.0409	2.2682	1.0273	0.0045	0.6091	1.2727	0	0	0	0.0045	0.9955	1.0045	0.35	2.7864	4.0455	5.8455	8.0318	6.4818	7.7591	9.3318
Large Micelles Model 2-2	9.6182	13.25	11.2	3.1955	2.9364	2.6909	5.2136	0.4773	0.1591	0.5864	0.5818	0.0182	0.0273	0.0727	0.0045	0.0227	0.0045	0.0045	1.0455	1.1455	0.65	3.6455	4.4	6.7455	5.0682	1.7455	4.2636	7.2318
Large Micelles Model 2-3	5.8364	10.3682	12.7045	0.6318	1.3409	5.8591	2.5909	0.0364	0.65	3.4591	0	0.0136	0.0455	0.05	0.0045	0	0	0.0091	0.0136	0.7955	0.8364	0.5909	3	6.8364	6.2136	8.5773	11.0318	12.1364
