# Supplementary material for: Active site geometry stabilization of a presenilin homolog by the lipid bilayer promotes intramembrane proteolysis
Source: eLife journal article supplement (doi:10.7554/elife.76090), 2022-05-17
Supplement: fig6-figsupp3-data1 [file Figure6-figure supplement3F-PSH-RMSF.xlsx]

## Sheet: Tabelle1
Figure 6 - Figure supplement 3F - PSH-RMSF. Source data for PSH RMSF (Å) (Figure 6 - Figure supplement 3F).
	RES1	RES2	RES3	RES4	RES5	RES6	RES7	RES8	RES9	RES10	RES11	RES12	RES13	RES14	RES15	RES16	RES17	RES18	RES19	RES20	RES21	RES22	RES23	RES24	RES25	RES26	RES27	RES28	RES29	RES30	RES31	RES32	RES33	RES34	RES35	RES36	RES37	RES38	RES39	RES40	RES41	RES42	RES43	RES44	RES45	RES46	RES47	RES48	RES49
Micelles Model 2-1							2.3091	1.8874	1.2512	1.1525	1.0045	0.7621	0.6429	0.6807	0.6455	0.5188	0.5127	0.5572	0.5048	0.4602	0.512	0.5277	0.5168	0.5619	0.6072	0.5933	0.6732	0.7512	0.8079	0.9246	1.0323	1.0936	1.2398	1.4036	1.4134	1.5561	1.3568	1.0677	1.2048	1.4163	0.7162	0.6589	0.7175	0.7958	0.7343	0.6116	0.5534	0.5895	0.5872
Micelles Model 2-2							1.0412	0.9953	0.9159	1.0491	1.0408	0.9567	0.8428	0.8587	0.8117	0.6459	0.6284	0.6996	0.5889	0.4869	0.5609	0.5474	0.5238	0.5743	0.5852	0.5389	0.5539	0.6311	0.6777	0.7043	0.8781	1.3791	1.5118	1.3745	1.7683	1.8228	1.6908	1.4109	1.4536	0.9925	0.7148	0.6666	0.7469	0.9205	0.872	0.7227	0.6696	0.7364	0.7667
Micelles Model 2-3							1.0299	0.9682	0.8687	0.8376	0.72	0.6364	0.5812	0.5857	0.5873	0.5386	0.5464	0.6094	0.5395	0.5326	0.5965	0.6002	0.6145	0.6828	0.7654	0.7158	0.7005	1.1442	1.3671	1.1216	0.9937	2.1371	2.8753	2.7799	2.6657	2.3597	2.9536	2.6782	2.5711	2.1495	2.4067	1.8965	1.1936	1.105	1.0788	0.9891	0.7583	0.7824	0.8496
Large Micelles Model 2-1							2.416	1.6508	1.3844	1.2313	0.8429	0.6178	0.5659	0.5875	0.5805	0.4861	0.5341	0.5814	0.4874	0.4543	0.5423	0.5238	0.4829	0.52	0.5791	0.5166	0.4939	0.5601	0.5743	0.5235	0.592	0.7322	0.7569	0.7584	0.6803	0.7593	0.9399	0.8224	0.8835	0.7131	0.599	0.653	0.7149	0.8625	0.8453	0.6946	0.6227	0.6754	0.6938
Large Micelles Model 2-2							1.2888	1.1386	0.9468	0.9094	0.7704	0.5966	0.5394	0.5807	0.5231	0.4242	0.4505	0.4938	0.4214	0.393	0.4486	0.4363	0.4135	0.4624	0.484	0.4521	0.4688	0.5468	0.5509	0.566	0.6713	0.7272	0.7492	0.8695	0.828	0.8004	0.8988	1.0525	1.1845	0.8479	0.7489	0.7852	0.7672	0.9062	0.8163	0.7095	0.6646	0.7281	0.7435
Large Micelles Model 2-3							1.1522	0.8072	0.6567	0.7194	0.655	0.5482	0.5284	0.5629	0.5119	0.4418	0.4803	0.5021	0.4229	0.4071	0.497	0.5284	0.521	0.5941	0.7176	0.6306	0.6669	0.8429	0.8242	0.77	0.8259	0.7759	0.786	0.8242	0.7887	0.6968	0.6808	0.6857	0.7086	0.718	0.8003	0.9269	0.8117	0.8608	0.7949	0.7048	0.6981	0.7175	0.6787
[truncated: 244 more columns]
