# Supplementary material for: Active site geometry stabilization of a presenilin homolog by the lipid bilayer promotes intramembrane proteolysis
Source: eLife journal article supplement (doi:10.7554/elife.76090), 2022-05-17
Supplement: fig6-figsupp3-data1 [file Figure6-figure supplement3G-TMD6a.xlsx]

## Sheet: Tabelle1
Figure 6 - Figure supplement 3F - TMD6a. Source data for PSH RMSF (Å) (Figure 6 - Figure supplement 3G).
	RES170	RES171	RES172	RES173	RES174	RES175	RES176	RES177	RES178	RES179	RES180	RES181	RES182	RES183	RES184	RES185
Micelles Model 2-1	0.9218	0.9334	0.9441	1.231	1.6959	1.2652	1.9606	2.7038	2.6081	2.3114	1.9324	2.1805	1.9622	2.2456	1.6731	1.102
Micelles Model 2-2	1.6368	1.6308	1.5984	1.5031	1.5628	1.6461	1.6294	1.6691	1.87	1.8534	1.9811	1.9764	1.7125	1.2707	1.0571	0.9896
Micelles Model 2-3	0.8783	0.8758	0.7627	0.7549	0.7091	0.7086	0.7876	0.8278	0.9213	0.9594	1.4166	1.3798	1.3314	1.209	1.1126	0.7499
Large Micelles Model 2-1	1.1835	1.0885	1.1153	1.2845	1.3332	1.4955	1.9061	2.1434	2.1582	2.6074	2.4054	1.9639	1.212	1.0737	0.9613	0.9096
Large Micelles Model 2-2	1.2208	1.3248	1.1964	1.4409	1.5596	1.8327	2.0532	2.2739	2.0017	1.2334	1.0945	1.1527	1.4938	1.3007	1.2154	1.1921
Large Micelles Model 2-3	0.8369	0.8022	0.7593	0.713	0.6146	0.5693	0.6224	0.6934	0.8701	1.0333	1.074	0.8597	0.6918	0.6242	0.538	0.4926
