# Supplementary material for: Active site geometry stabilization of a presenilin homolog by the lipid bilayer promotes intramembrane proteolysis
Source: eLife journal article supplement (doi:10.7554/elife.76090), 2022-05-17
Supplement: fig7-data1 [file Figure7A-RMSD.xlsx]

## Sheet: Tabelle1
Figure 7A - RMSD. Source data for RMSD (Å) (Figure 7A).
	frame1	frame2	frame3	frame4	frame5	frame6	frame7	frame8	frame9	frame10	frame11	frame12	frame13	frame14	frame15	frame16	frame17	frame18	frame19	frame20	frame21	frame22	frame23	frame24	frame25	frame26	frame27	frame28	frame29	frame30	frame31	frame32	frame33	frame34	frame35	frame36	frame37	frame38	frame39	frame40	frame41	frame42	frame43	frame44	frame45	frame46	frame47	frame48	frame49
Bilayer M172K-1	0	1.8936	1.9728	1.9482	2.009	1.9567	1.9775	2.0539	1.9711	2.2024	2.2068	2.4603	2.5563	2.4517	2.6285	2.4434	2.4328	2.3697	2.2128	2.0873	2.2765	2.4316	2.6056	2.7364	2.747	2.804	2.8361	2.8832	2.839	2.7769	2.8269	2.7176	2.8265	2.746	2.9888	2.7783	2.7386	2.8454	2.8577	2.707	2.5567	2.6693	2.7513	2.7963	2.6714	2.7209	3.0354	2.9296	3.0067
Bilayer M172K-2	0	1.5048	1.4859	1.8268	2.1158	2.2448	2.2437	2.3144	2.3859	2.34	2.5126	2.3123	2.4596	2.5904	2.5686	2.4731	2.6757	2.6759	2.6186	2.6113	2.6083	2.5251	2.6057	2.6863	2.6437	2.6949	2.8041	2.716	2.8659	2.6088	2.6493	2.6213	2.8172	2.6952	2.624	2.8106	2.7131	2.587	2.7436	2.6858	2.6473	2.6375	2.8404	2.7996	2.763	2.7019	2.8785	2.9265	2.7897
Bilayer M172K-3	0	1.3512	1.5807	2.0776	1.9298	2.1375	2.0179	2.3387	2.3018	2.435	2.4516	2.9022	2.8355	2.7272	2.8354	2.5233	2.632	2.7304	2.6863	2.7379	2.7355	2.6331	2.5453	2.4948	2.3782	2.63	2.4785	2.5714	2.8961	2.8828	3.2152	3.1515	3.028	3.4018	3.2185	3.3236	3.3172	3.3264	3.7101	3.399	3.3268	3.3178	3.2722	3.4946	3.2448	3.0391	3.1861	3.0712	2.9415
Bilayer I173K-1	0	1.573	2.2056	2.1079	2.1578	2.1181	2.2642	2.2415	2.2233	2.2829	2.2225	2.2302	1.9871	2.0151	2.2023	2.425	2.2966	2.1252	2.2526	2.3548	2.4245	2.6483	2.7486	2.6895	2.7037	2.5894	2.6112	2.8397	2.8102	2.7937	2.8153	2.7985	2.8231	2.7819	2.8502	2.8578	2.9248	2.9246	2.8765	2.8038	2.9601	2.9381	3.0465	3.2712	3.0333	3.029	3.2024	3.1485	3.3212
Bilayer I173K-2	0	1.4908	1.8349	1.8265	1.8951	1.9112	1.8418	1.9951	1.8854	1.7415	1.7951	1.8193	1.9526	1.9426	1.8836	2.1445	2.2118	1.8918	1.9032	2.1596	2.3626	2.2086	1.9903	2.0351	2.0141	1.9473	2.2541	2.1462	2.322	2.3938	2.6164	2.7194	2.8268	2.8714	2.7304	2.4167	2.4925	2.356	2.5593	2.673	2.6621	2.4596	2.6321	2.6493	2.485	2.6033	2.6676	2.4987	2.4705
Bilayer I173K-3	0	1.4031	1.8796	2.1975	2.2769	2.2042	2.5632	2.7843	2.8869	3.0645	2.8089	2.9231	3.0602	2.9989	2.9213	2.9423	2.9675	2.9128	2.9032	2.7137	2.9578	3.0331	3.0354	2.874	3.1981	3.0146	2.8578	2.8263	2.9669	3.0599	3.0028	3.1461	2.984	3.043	2.9066	2.8792	2.8712	2.8806	2.9933	2.9507	2.8948	2.7085	2.8157	2.9661	2.9612	2.8597	2.7946	2.8379	2.7471
Bilayer L175K-1	0	1.5627	1.7397	1.9672	2.0717	1.9696	2.0549	1.9366	2.0945	2.1564	2.2102	2.2698	2.0394	2.0618	2.1273	2.0752	2.0766	2.0998	2.1966	1.9641	1.9365	2.0597	1.7874	1.9588	2.2234	1.9253	2.0673	2.2152	2.0677	2.1196	2.1228	2.0934	2.2179	2.0118	2.2454	2.3325	2.252	2.2035	2.3006	2.2814	2.5351	2.4861	2.4456	2.5671	2.6144	2.3511	2.3482	2.2926	2.4197
Bilayer L175K-2	0	1.7349	1.9811	2.0201	1.7859	1.8836	1.8654	2.0708	2.1075	2.1833	2.1143	2.2959	2.2966	2.0985	2.2007	2.2977	2.1494	2.2135	2.1526	2.3522	2.2819	2.3575	2.4583	2.5271	2.4527	2.4985	2.5083	2.2741	2.1851	2.1058	2.2975	2.3312	2.5308	2.4928	2.5065	2.5608	2.3153	2.2698	2.4985	2.4654	2.4939	2.5101	2.5414	2.3085	2.5135	2.5025	2.5825	2.4437	2.6403
Bilayer L175K-3	0	1.2854	1.2914	1.922	1.8711	1.9649	2.0031	2.0532	2.0361	1.7841	2.1122	2.0822	2.1102	1.9767	2.0319	2.1312	1.9374	1.944	1.7435	1.9723	2.1155	2.0488	2.024	2.1444	2.0805	2.1842	2.5073	2.3675	2.4796	2.4627	2.5037	2.5269	2.6477	2.5957	2.513	2.7794	2.6587	2.554	2.4143	2.4442	2.5691	2.7383	2.6967	2.8278	2.7579	2.4731	2.6043	2.777	2.7455
Bilayer A176K-1	0	1.7485	2.4521	2.3494	2.9349	2.8329	2.4457	2.4258	2.6532	2.0965	2.2553	2.2839	2.3118	2.4475	2.6068	2.4093	2.4983	2.5175	2.523	2.6356	2.5886	2.2615	2.4201	2.5412	2.5374	2.3489	2.4979	2.3878	2.4663	2.5849	2.4559	2.5143	2.5659	2.8102	2.7798	2.6915	2.6244	2.5413	2.5506	2.4846	2.5955	2.6122	2.6847	2.7771	2.8956	2.6377	2.5158	2.6127	2.436
Bilayer A176K-2	0	1.2783	1.6643	2.0141	2.0026	2.267	2.1915	2.4142	2.8146	2.7685	2.9853	3.0067	2.8955	3.3403	3.0266	3.2243	3.1179	3.2836	3.3701	3.2946	3.0774	3.2983	3.2214	3.3754	3.7756	3.654	3.7247	3.7168	3.582	3.6204	3.5095	3.796	3.4365	3.6587	3.3679	3.5279	3.5672	3.4117	3.4301	3.6797	3.7673	3.5594	3.8195	3.7107	3.7148	3.673	3.7793	3.8227	3.8714
Bilayer A176K-3	0	1.4857	1.5535	1.6737	1.9215	2.2272	2.3868	2.5164	2.5024	2.6706	2.7099	2.276	2.3996	2.8021	2.7298	2.7802	2.8148	2.8191	3.0676	3.1626	2.8695	2.6356	2.8668	2.7955	2.9588	2.9552	2.8408	2.8127	2.7075	2.7976	2.6314	3.0094	3.0237	3.0126	2.86	2.9509	2.8821	2.8116	2.7144	2.7421	2.7803	2.719	2.8019	2.9391	2.8185	2.9384	3.0061	3.035	3.1007
[truncated: 551 more columns]
