# Supplementary material for: Active site geometry stabilization of a presenilin homolog by the lipid bilayer promotes intramembrane proteolysis
Source: eLife journal article supplement (doi:10.7554/elife.76090), 2022-05-17
Supplement: fig7-data1 [file Figure7B-C83-RMSF.xlsx]

## Sheet: Tabelle1
Figure 7B - C83-RMSF. Source data for C83 RMSF (Å) (Figure 7B).
	RES26	RES27	RES28	RES29	RES30	RES31	RES32	RES33	RES34	RES35	RES36	RES37	RES38	RES39	RES40	RES41	RES42	RES43	RES44	RES45	RES46	RES47	RES48	RES49	RES50	RES51	RES52	RES53
Bilayer M172K-1	2.8034	2.2179	1.8776	1.6778	1.5432	1.3476	1.1548	1.0693	0.9194	0.6945	0.7303	0.7324	0.7471	0.7004	0.6056	0.5801	0.5545	0.5187	0.5103	0.489	0.5122	0.569	0.6043	0.7072	0.6266	0.7425	0.8305	1.1644
Bilayer M172K-2	4.5237	4.1526	3.1864	2.592	2.4878	2.0796	1.7256	1.7921	1.6822	1.3204	1.2036	1.2415	1.0104	0.7692	0.8601	0.8382	0.6876	0.6644	0.7159	0.7027	0.6707	0.6773	0.6608	0.6485	0.822	0.9303	1.0497	1.2673
Bilayer M172K-3	4.1495	3.1301	2.0846	1.6656	1.3461	1.1354	1.0934	1.0203	0.8358	0.7304	0.7947	0.7751	0.6694	0.5962	0.6049	0.622	0.5801	0.5702	0.6207	0.5981	0.5876	0.6313	0.7179	0.7554	0.6811	0.6457	0.6235	0.6993
Bilayer I173K-1	2.9228	2.2203	1.6659	1.378	1.1202	0.9351	0.9656	0.9597	0.7695	0.7365	0.8456	0.813	0.7603	0.6505	0.5367	0.5591	0.5393	0.501	0.4888	0.4838	0.4735	0.4734	0.4785	0.5208	0.5822	0.6587	0.8386	0.954
Bilayer I173K-2	3.232	2.3717	1.9921	1.6765	1.3036	1.0698	1.2534	1.303	1.0382	0.9542	1.1796	1.1481	0.9451	0.8181	0.7196	0.7242	0.6155	0.6968	0.8458	0.8174	0.8288	1.1525	0.8011	0.6488	0.6449	0.6416	0.7535	1.1099
Bilayer I173K-3	4.0457	3.6641	2.615	2.3745	1.9103	1.5688	1.75	1.6653	1.2472	1.0081	1.041	0.9947	0.8738	0.7865	0.8	0.724	0.6804	0.6936	0.7071	0.6364	0.583	0.6108	0.7832	0.6805	0.7985	0.895	0.8869	1.1066
Bilayer L175K-1	5.5842	4.9064	3.9367	3.4301	2.7982	2.2559	2.0478	1.759	1.299	1.1981	1.0968	0.94	0.7876	0.7233	0.673	0.6174	0.5983	0.5858	0.5592	0.5614	0.6374	0.7414	0.9699	0.8294	0.6979	0.625	0.6786	0.98
Bilayer L175K-2	1.4422	1.4829	1.2956	1.1994	1.0393	0.87	0.8255	0.7724	0.6735	0.6	0.6346	0.6069	0.5711	0.5342	0.521	0.5091	0.5339	0.5117	0.4921	0.4699	0.4405	0.4413	0.4512	0.4499	0.4421	0.4971	0.564	0.6579
Bilayer L175K-3	2.4291	2.0897	1.649	1.5382	1.3959	1.1222	0.9901	0.9978	0.873	0.6907	0.6742	0.6858	0.6103	0.5156	0.5267	0.5021	0.495	0.4824	0.4796	0.4756	0.452	0.456	0.4466	0.482	0.5353	0.54	0.6638	1.0996
Bilayer A176K-1	3.5056	3.3565	3.2511	2.2882	1.8509	1.6082	1.5171	1.3716	1.2016	1.1074	1.0581	0.9326	0.8723	0.8432	0.7824	0.7478	0.7713	0.7995	0.7685	0.6424	0.6293	0.7585	0.8414	0.7308	0.7964	0.8204	0.851	1.0256
Bilayer A176K-2	2.9755	2.4571	2.2172	1.9738	1.6608	1.4712	1.2986	1.0645	0.9228	0.8273	0.8013	0.7946	0.7216	0.6405	0.685	0.7228	0.6403	0.6163	0.6725	0.6294	0.5957	0.6002	0.6174	0.571	0.5488	0.6415	0.8407	1.2993
Bilayer A176K-3	3.4123	3.6075	2.9761	2.1236	1.3005	0.9443	0.8929	0.8796	0.75	0.6663	0.6638	0.6477	0.6036	0.5859	0.5916	0.5833	0.5572	0.5611	0.5779	0.5855	0.6099	0.9205	1.2529	0.7473	0.841	0.8584	0.9017	1.16
