# Supplementary material for: Active site geometry stabilization of a presenilin homolog by the lipid bilayer promotes intramembrane proteolysis
Source: eLife journal article supplement (doi:10.7554/elife.76090), 2022-05-17
Supplement: fig7-data1 [file Figure7C-C83-water.xlsx]

## Sheet: Tabelle1
Figure 7C - C83-water. Source data for C83 water accessibility (Figure 7C).
	RES26	RES27	RES28	RES29	RES30	RES31	RES32	RES33	RES34	RES35	RES36	RES37	RES38	RES39	RES40	RES41	RES42	RES43	RES44	RES45	RES46	RES47	RES48	RES49	RES50	RES51	RES52	RES53
Bilayer M172K-1	11.0273	8.1864	12.8636	3.1773	1.1955	2.1818	3.85	0.1091	0.0045	1.9909	1.4045	0.0045	0.0182	0.9364	0.0455	0.0455	0.0136	0.0364	0.0455	0	0.0045	1.8682	1.0818	5.6182	4.6636	6.5773	6.4864	10.4545
Bilayer M172K-2	10.7682	14.3091	14.9182	6.0455	4.6818	4.7909	6.4591	1.5591	0.0727	0.4182	0.8682	0.1591	0.0136	0.0091	0.0318	0.0045	0.0955	0.0045	2.2682	2.1455	1.9409	3.9591	7.1864	6.5182	6.2273	2.9545	5.9545	9.5273
Bilayer M172K-3	10.6773	11.2273	12.6545	3.4318	1.8818	2.25	4.8455	0.1273	0.05	0.3455	2.1409	0	0.0955	0.4955	0.0409	0.1545	0.0818	0.05	0.95	0.9545	0.3318	3.7409	4.9364	5.7955	8.3364	6.3	5.6545	5.7955
Bilayer I173K-1	10.1909	11.5909	11.3091	4.2364	1.7591	2.45	3.8409	0.7318	0	1.6909	4.6955	0.1682	0.9636	2.2	0.1182	0.1182	0.0455	0.0045	0.1091	0.2045	0.9955	2.0682	3.3045	6.1227	3.5864	3.5773	5.35	11.9773
Bilayer I173K-2	9.7455	10.1818	14.55	2.8682	1.3091	1.9364	6.7955	0.7	0.0182	0.5591	2.2727	0.0318	0.0136	0.3182	0.0545	0.0182	0	0.0545	1.0091	2.2409	1.7818	4.0545	6.4682	7.7545	8.1182	5.3636	4.9045	7.4136
Bilayer I173K-3	11.6364	9.4091	12.4	2.3864	2.0364	5.8636	3.3773	0.0227	2.2	4.5955	1.2818	0	0.0591	0.3455	0	0	0	0	0.7682	0.8818	0.4182	3.1	4.3182	5.4909	5.3727	8.0136	7.4727	13.5591
Bilayer L175K-1	10.0682	13.4182	13.7955	5.6136	5.0864	2.9591	6.85	1.5591	1.0136	1.4045	3.1182	0.2273	0.2727	0.7318	0.1045	0.1727	0.1091	0	0.3773	0.9864	0.7318	2.4909	6.2273	6.6045	7.9091	3.3455	8.8864	10.2182
Bilayer L175K-2	6.9045	11.1091	14.7455	2.1409	2.2409	2.2727	3.3182	0	1.2864	3.8636	3.9182	0	0	0.8273	0.0091	0	0	0	1.1227	1.0045	0.35	3.3955	4.6318	5.5227	4.0091	2.8636	5.2636	15.2409
Bilayer L175K-3	12.0909	11.4409	15.1091	2.8455	1.8591	4.2955	4.0273	0.0045	0.3955	4.6182	0.1091	0.0045	0.3227	0.1364	0	0	0	0	1	1	0.3364	2.75	4.5364	5.9591	5.1591	2.0227	5.5	9.1409
Bilayer A176K-1	11.0318	8.35	15.35	2.9909	1.1864	2.8409	5.8364	0.05	0.0045	2.7364	0.4682	0.0045	0.0045	0.1864	0.0136	0.0045	0.0182	0.0636	0.6455	0.2727	0.05	2.6818	5.4045	6.9636	7.0364	5.7227	8.5727	11.6182
Bilayer A176K-2	11.4318	7.7818	15.0773	2.9227	1.8045	5.6409	4.0045	0.0636	0.6636	2.9636	1.65	0	0.0136	1.4091	0.1045	0.0091	0.0091	0.4636	0.1636	0.2955	0.0182	1.05	2.4727	4.3591	4.3409	5.8	9.95	13.2636
Bilayer A176K-3	10.4727	9.7136	15.3773	6.6227	4.35	3.6773	4.7818	0.6727	0.1045	0.4364	0.6182	0.0182	0.0364	0.0591	0.0045	0.1136	0.0818	0.0045	0.2318	1.1273	0.3773	1.7045	2.8818	4.9727	1.9864	4.6091	7.0364	9.6273
