# Supplementary material for: Active site geometry stabilization of a presenilin homolog by the lipid bilayer promotes intramembrane proteolysis
Source: eLife journal article supplement (doi:10.7554/elife.76090), 2022-05-17
Supplement: fig7-data1 [file Figure7E-PSH-RMSF.xlsx]

## Sheet: Tabelle1
Figure 7E - PSH-RMSF. Source data for PSH RMSF (Å) (Figure 7E).
	RES1	RES2	RES3	RES4	RES5	RES6	RES7	RES8	RES9	RES10	RES11	RES12	RES13	RES14	RES15	RES16	RES17	RES18	RES19	RES20	RES21	RES22	RES23	RES24	RES25	RES26	RES27	RES28	RES29	RES30	RES31	RES32	RES33	RES34	RES35	RES36	RES37	RES38	RES39	RES40	RES41	RES42	RES43	RES44	RES45	RES46	RES47	RES48	RES49
Bilayer M172K-1							1.238	0.9305	0.8981	0.9796	0.8915	0.6946	0.6676	0.7311	0.6507	0.5251	0.5596	0.6067	0.5158	0.4708	0.5075	0.488	0.4531	0.5271	0.5917	0.508	0.481	0.6053	0.5739	0.5355	0.5617	0.6131	0.5963	0.5743	0.5934	0.6676	0.6886	0.648	0.6721	0.6533	0.5853	0.6498	0.7469	0.8241	0.8182	0.7143	0.6017	0.6324	0.6071
Bilayer M172K-2							1.8027	1.4237	1.3475	1.3093	1.0877	0.8124	0.7336	0.8027	0.7544	0.5737	0.615	0.7554	0.6776	0.6059	0.6955	0.7568	0.7268	0.8057	0.935	0.8017	0.7819	1.0079	0.9224	0.8857	1.2533	1.8944	1.9748	2.1471	2.4102	2.7712	2.6582	1.8139	1.6204	1.1228	0.7751	0.7146	0.7654	0.7773	0.7965	0.74	0.681	0.6881	0.6674
Bilayer M172K-3							1.3613	1.1759	1.186	0.9129	0.7793	0.6261	0.6483	0.6405	0.5872	0.5002	0.5256	0.562	0.478	0.4562	0.5269	0.5347	0.4935	0.5649	0.6334	0.6208	0.6626	0.7933	0.6771	0.6413	0.7825	0.8605	0.9028	1.0345	0.958	0.8692	0.7801	0.7595	0.8659	0.7488	0.653	0.6163	0.6385	0.7642	0.7865	0.6857	0.6873	0.7349	0.7229
Bilayer I173K-1							1.89	1.5784	1.2691	1.0182	0.9415	0.7752	0.6449	0.6724	0.6521	0.5311	0.5452	0.6041	0.5176	0.4787	0.5688	0.5933	0.5592	0.6689	0.8358	0.7349	0.7754	1.0937	0.9828	0.7935	1.0136	1.1251	0.9733	0.9606	1.0955	0.7867	0.7148	0.7484	0.8996	0.7263	0.6408	0.6224	0.672	0.7424	0.6772	0.6072	0.5864	0.6076	0.6132
Bilayer I173K-2							4.0397	2.3788	1.477	1.1373	0.9558	0.7404	0.6746	0.6719	0.631	0.541	0.5794	0.6155	0.5386	0.5313	0.6004	0.5721	0.536	0.5759	0.5993	0.5706	0.6802	0.8725	0.8911	0.8505	1.0074	1.2456	1.2007	1.6653	1.8538	1.228	1.215	1.0611	1.171	0.909	0.7157	0.7287	0.9157	1.2599	1.2611	0.9145	0.839	0.9896	0.8867
Bilayer I173K-3							5.8077	3.9222	2.0492	1.3708	0.8861	0.7919	0.8005	0.7943	0.7775	0.7088	0.7392	0.8122	0.7113	0.6427	0.7536	0.8092	0.7419	0.799	0.9887	0.9003	0.9037	1.166	1.1956	1.0296	1.196	1.3796	1.2599	1.2727	1.2896	0.9305	0.8746	1.0074	1.4433	1.2164	1.0188	1.0397	1.0824	1.1402	1.0798	0.8553	0.7095	0.8371	0.8973
Bilayer L175K-1							0.7527	0.7517	0.6965	0.7476	0.6503	0.5837	0.5375	0.5276	0.4942	0.4328	0.4405	0.484	0.4342	0.4123	0.4848	0.512	0.4934	0.5498	0.6418	0.586	0.57	0.7262	0.7557	0.8036	0.9627	1.1537	1.2436	1.372	1.3475	1.5309	1.6507	1.8026	1.9615	1.0817	0.7108	0.6156	0.6365	0.6984	0.7437	0.6827	0.652	0.6881	0.6847
Bilayer L175K-2							1.2083	0.9107	0.7598	0.7575	0.6777	0.5882	0.5341	0.5267	0.4912	0.4529	0.4748	0.4859	0.4316	0.4041	0.4434	0.4484	0.4248	0.4623	0.4858	0.4684	0.5399	0.6717	0.6012	0.5182	0.6162	0.6897	0.656	0.6816	0.5958	0.5348	0.5114	0.54	0.6605	0.5902	0.5912	0.6021	0.5774	0.659	0.629	0.5359	0.5157	0.5615	0.5724
Bilayer L175K-3							2.6617	1.9538	1.1771	0.8222	0.6973	0.592	0.5594	0.5688	0.5192	0.46	0.4803	0.5085	0.432	0.4161	0.4602	0.4708	0.4645	0.4912	0.5746	0.5345	0.5427	0.6308	0.5849	0.5428	0.5503	0.6317	0.6449	0.6904	0.8563	0.7493	0.6683	0.7094	1.1426	0.8194	0.6881	0.766	0.8636	0.773	0.6494	0.5599	0.5788	0.6131	0.5813
Bilayer A176K-1							1.4151	1.2647	1.0394	0.8132	0.6823	0.5966	0.5858	0.6121	0.5873	0.5415	0.5783	0.6284	0.5943	0.5848	0.6883	0.7214	0.7385	0.835	0.8859	0.8366	0.8614	1.123	1.1005	0.9037	1.0888	1.3163	1.1964	1.1048	1.1316	1.235	1.083	0.9758	1.1164	0.9416	0.7821	0.8261	0.9175	1.0681	1.0671	0.8663	0.8499	0.9358	0.8896
Bilayer A176K-2							1.1604	0.9158	1.0602	0.8789	0.6649	0.5915	0.5938	0.6069	0.5557	0.4736	0.4935	0.5302	0.4738	0.4606	0.5395	0.5533	0.5297	0.5954	0.7161	0.6465	0.6093	0.7387	0.7997	0.7284	0.7331	0.8262	0.885	0.7799	0.7883	0.8149	0.8189	0.8001	0.9315	0.7481	0.6547	0.6714	0.6994	0.7703	0.7735	0.7005	0.6275	0.7528	0.8451
Bilayer A176K-3							2.1136	1.7807	1.1973	1.1458	0.9663	0.7883	0.712	0.7291	0.6926	0.5828	0.6049	0.647	0.5474	0.5367	0.5975	0.6079	0.583	0.6603	0.7538	0.7174	0.7006	0.8432	0.7958	0.7361	0.8009	0.8836	0.8905	0.909	0.8364	1.0049	1.1311	0.8575	1.0521	0.8453	0.6962	0.6188	0.6431	0.7257	0.7729	0.7152	0.6636	0.6887	0.6869
[truncated: 244 more columns]
