# Supplementary material for: Active site geometry stabilization of a presenilin homolog by the lipid bilayer promotes intramembrane proteolysis
Source: eLife. 2022 May 17;11:e76090. doi: 10.7554/eLife.76090 (PMC9282858; doi:10.7554/eLife.76090)
Supplement: Figure 1—source data 2. [file elife-76090-fig1-data2.xlsx]

## Sheet: figure1
Figure 1 - Source data 1. Calculated and observed masses for Aβ species in MALDI-TOF mass spectrometry (Source data for Figure 1D).
Aβ*	Calculated mass [Da]	Observed mass [Da]
1-38	4262.78	4260.71
1-40	4461.05	4459.39
1-42	4645.29	4643.83
1-43	4746.39	4745.17
1-45	4958.68	4957.89
1-46	5057.82	5057.99
*All Aβ species start with an additional N-terminal methionine.
