# Supplementary material for: Active site geometry stabilization of a presenilin homolog by the lipid bilayer promotes intramembrane proteolysis
Source: eLife. 2022 May 17;11:e76090. doi: 10.7554/eLife.76090 (PMC9282858; doi:10.7554/eLife.76090)
Supplement: Figure 2—figure supplement 1—source data 1. [file elife-76090-fig2-figsupp1-data1.xlsx]

## Sheet: Tabelle1
Figure 2 - Figure supplement 1 - Source data 1. Raw values of measured fluorescence intensities (Figure 2 - Figure supplement 2A).
Fraction	Empty vesicles	Vesicles with PSH
1	0.0741	0.0616
2	0.0642	0.0778
3	0.1235	0.1609
4	0.3839	0.2851
5	0.1882	0.1312
6	0.0691	0.0695
7	0.0537	0.058
8	0.031	0.0439
9	0.035	0.0438
10	0.0445	0.0314
11	0.0296	0.0328
12	0.0188	0.0227
13	0.0448	0.0418
14	0.0435	0.0441
15	0.0505	0.0551
16	0.0352	0.0553
