# Supplementary material for: Active site geometry stabilization of a presenilin homolog by the lipid bilayer promotes intramembrane proteolysis
Source: eLife. 2022 May 17;11:e76090. doi: 10.7554/eLife.76090 (PMC9282858; doi:10.7554/eLife.76090)
Supplement: Figure 2—source data 2. — The differences between calculated and observed masses for AICD species arise from different adducts as specified in the respective tables. The GSI controls in Figure 2—figure supplement 2B show that the observed peaks are specific for AICD species derived from PSH cleavage. [file elife-76090-fig2-data2.xlsx]

## Sheet: figure2
Figure 2 - Source data 1. Calculated and observed masses for Aβ and AICD species in MALDI-TOF mass spectrometry (Source data for Figure 2C, D).
DDM				POPC
Aβ*	Calculated mass [Da]	Observed mass [Da]		Aβ*	Calculated mass [Da]	Observed mass [Da]
1-38	4262.78	4264.73		1-38	4262.78	4265.31
1-40	4461.05	4464.42		1-40	4461.05	4464.12
1-42	4645.29	4650.11		1-42	4645.29	4652.58
DDM				POPC
AICD#	Calculated mass [Da]	Observed mass [Da]		AICD#	Calculated mass [Da]	Observed mass [Da]
AICD51 (ε48)	7234.10	7268.071		AICD51 (ε48)	7234.10	7296.603
AICD50 (ε49)	7120.94	7166.522		AICD50 (ε49)	7120.94	7167.932
* All Aβ species start with an additional N-terminal methionine.
# All AICD species contain a C-terminal hexa-histidine tag which is fused to the C99 C-terminus via a GSRS linker.
1 observed mass correspond to AICD with an oxidized methionine.
2 observed mass correspond to AICD disodium adduct [AICD+2Na]+.
3 observed mass coresspond to AICD sodium and potassium adduct [AICD+Na+K]+.
