# Supplementary material for: Active site geometry stabilization of a presenilin homolog by the lipid bilayer promotes intramembrane proteolysis
Source: eLife. 2022 May 17;11:e76090. doi: 10.7554/eLife.76090 (PMC9282858; doi:10.7554/eLife.76090)
Supplement: Figure 3—source data 2. [file elife-76090-fig3-data2.xlsx]

## Sheet: Tabelle1
Figure 3 - Source data 1. Raw data of p3 and Aβ concentrations measured in the ECL-IA and calculated p3-40/p3-42 and Aβ40/Aβ42 ratios. (Source data for Figure 3C, D).
n	DDM [pg/ml]				POPC [pg/ml]
	C83		C99		C83		C99
	p3-40	p3-42	Aβ40	Aβ42	p3-40	p3-42	Aβ40	Aβ42
1	141.23	438.98	165.22	379.68	293.72	259.19	438.58	321.36
2	56.73	187.78	91.96	222.93	192.45	157.82	259.58	247.51
3	31.29	80.80	474.55	1328.61	356.16	358.66	1484.04	1265.23
n	DDM				POPC
	p3-40/p3-42		Aβ40/42		p3-40/p3-42		Aβ40/42
1	0.32		0.44		1.31		1.36
2	0.30		0.41		1.22		1.05
3	0.39		0.36		0.99		1.17
