# Supplementary material for: Active site geometry stabilization of a presenilin homolog by the lipid bilayer promotes intramembrane proteolysis
Source: eLife. 2022 May 17;11:e76090. doi: 10.7554/eLife.76090 (PMC9282858; doi:10.7554/eLife.76090)
Supplement: Figure 8—source data 1. [file elife-76090-fig8-data1.xlsx]

## Sheet: Tabelle1
Figure8 - Source data 1. Source data for D162-D220 Cγ-Cγ distance (Å) (Figure 8A and Figure 8 - Figure supplement 1A-C).
	frame1	frame2	frame3	frame4	frame5	frame6	frame7	frame8	frame9	frame10	frame11	frame12	frame13	frame14	frame15	frame16	frame17	frame18	frame19	frame20	frame21	frame22	frame23	frame24	frame25	frame26	frame27	frame28	frame29	frame30	frame31	frame32	frame33	frame34	frame35	frame36	frame37	frame38	frame39	frame40	frame41	frame42	frame43	frame44	frame45	frame46	frame47	frame48	frame49
Bilayer Model 2-1	6.9355	7.1448	7.5226	7.4799	7.0067	7.0995	6.7686	7.0501	7.1005	7.3614	7.7517	7.3133	7.7281	7.2295	7.4198	6.7487	7.1762	7.4377	6.9343	7.0291	6.7738	7.3686	7.3323	7.2125	7.3029	8.1641	7.3962	7.3996	7.0949	7.2616	7.7482	7.5625	7.376	7.703	8.0471	7.1695	7.4529	7.1546	7.1846	7.0556	6.8719	7.0357	7.5729	7.0358	7.368	7.0083	6.9742	7.8426	7.2053
Bilayer Model 2-2	6.8351	6.8448	6.6808	6.8215	6.5723	7.0334	7.0224	6.9442	6.4893	7.232	7.3603	8.7809	8.2295	7.5273	7.973	7.5796	7.5051	7.7703	7.6418	8.0532	7.9848	8.1266	8.6042	7.9859	8.4006	8.13	8.69	7.8809	7.8823	7.561	7.773	7.0635	7.3695	7.3323	6.8742	7.3665	7.7825	7.1636	8.147	6.9673	6.5733	6.7139	6.7551	6.8238	7.3537	6.8039	6.9804	6.6968	6.6603
Bilayer Model 2-3	6.6476	6.6072	7.0051	6.8271	6.777	6.7059	6.163	7.1051	6.954	6.7954	6.5842	6.7416	6.5997	6.9982	6.8956	6.8294	6.667	7.1069	6.3388	6.3544	6.6281	6.4908	6.6995	6.7871	6.6655	6.9618	6.8243	6.6486	7.112	6.5949	6.9266	6.6879	6.7626	6.6567	7.1294	7.0628	6.7206	6.8235	6.9675	5.9507	6.9046	6.6702	6.6156	6.5926	7.0233	7.1343	6.9713	7.091	7.0447
Micelles Model 2-1	7.0146	6.4096	6.747	6.4243	6.5171	6.6359	6.0461	6.5042	6.798	6.6443	6.5246	6.3602	6.5165	6.6467	6.5999	7.0682	6.7939	6.4125	6.5644	6.5595	6.6114	6.3837	6.5209	6.4045	6.7614	6.1334	6.4736	6.5745	6.5431	6.1712	6.6586	6.2299	6.4603	6.7968	6.4622	6.5427	6.6155	6.1639	6.1417	6.5759	6.1745	6.2454	6.4784	6.4126	6.3955	6.6164	5.8227	6.2165	6.3892
Micelles Model 2-2	6.7338	8.9687	9.0231	8.7173	8.7409	9.1013	8.3912	9.2856	9.0529	9.1049	8.7007	9.5942	9.7522	9.5126	9.1628	9.5768	8.8349	7.9318	8.873	8.984	9.2324	9.7515	8.7026	9.6595	10.0001	9.6672	8.8517	8.7103	8.6357	8.0678	6.6178	7.5696	6.8227	6.5218	6.548	6.7209	6.9576	6.9239	6.7621	6.5482	6.8413	6.6422	6.48	6.6776	6.8757	6.6011	6.4648	6.6587	6.2216
Micelles Model 2-3	7.3592	6.5278	7.9071	7.7556	7.8685	7.4244	7.698	8.1792	7.9907	7.5811	8.2642	8.1073	7.7814	7.3255	8.1934	7.8366	6.7689	7.4878	7.195	7.7743	8.0191	7.2282	8.0329	7.7057	7.8006	8.3566	8.8912	9.8954	9.3762	8.2799	8.6186	8.3805	7.4394	6.9781	7.0044	6.517	6.758	6.5581	6.8034	6.4991	7.0756	6.7115	6.8431	6.9091	6.643	6.8905	6.8006	7.1896	6.8649
[truncated: 551 more columns]
