# Supplementary material for: Active site geometry stabilization of a presenilin homolog by the lipid bilayer promotes intramembrane proteolysis
Source: eLife. 2022 May 17;11:e76090. doi: 10.7554/eLife.76090 (PMC9282858; doi:10.7554/eLife.76090)
Supplement: Figure 8—source data 3. [file elife-76090-fig8-data3.xlsx]

## Sheet: Tabelle1
Figure 8 - Source data 1. Raw values of immunoblot quantitation. (Source data for Figure 8D).
n	DDM		POPC
	Merck C-bound PSH (% of total)	Merck C-bound PSH + L-685,458 (% of total)	Merck C-bound PSH (% of total)	Merck C-bound PSH + L-685,458 (% of total)
1	0.852	0.781	3128	2489
2	0.519	0.490	1666	1201
3	0.830	0.791	3119	2362
4	3596	3549	1960	0.854
The data shown in Figure 8D. represent the difference between Merck C-bound PSH and Merck C-bound PSH in the presence of L-685,458 as competitor.
n	DDM	POPC
1	0.071	0.639
2	0.029	0.465
3	0.039	0.757
4	0.047	1106
